# Supplementary material for: Computational design of self-assembling peptide chassis materials for synthetic cells
Source: Royal Society of Chemistry journal article supplement (doi:10.1039/d2me00169a), 2022-09-22
Supplement: d2me00169a1.csv [file d2me00169a1.csv]

Sequence	Predicted ΔG per residue (kBT)	Discovery Round	Computed ΔG per residue (kBT)
H5V5	-14.8 ± 0.2	2	-14.9 ± 0.2
H5F4	-14.1 ± 0.2	5	-14.2 ± 0.2
H5V4	-13.5 ± 0.1	3	-13.5 ± 0.1
H5L4	-13.2 ± 0.3	0	-13.3 ± 0.3
H5F5	-12.6 ± 0.1	6	-12.6 ± 0.1
H5L5	-11.7 ± 0.4	1	-11.5 ± 0.4
H5I4	-11.3 ± 2.5	N/A	N/A
H5C4	-11.3 ± 0.1	4	-11.3 ± 0.1
Y5F4	-11.2 ± 0.1	0	-11.2 ± 0.1
H5C5	-10.5 ± 1.2	N/A	N/A
H5A4	-10.5 ± 0.2	7	-10.5 ± 0.2
Y5I4	-10.3 ± 0.3	0	-10.4 ± 0.3
Y5F5	-10.2 ± 1.2	N/A	N/A
Y5C4	-10.2 ± 0.4	0	-10.3 ± 0.4
H5A5	-10.0 ± 1.4	N/A	N/A
Y5L5	-9.8 ± 1.2	N/A	N/A
Y5V4	-9.8 ± 0.2	0	-9.8 ± 0.2
H5M4	-9.7 ± 0.2	8	-9.6 ± 0.2
Y5L4	-9.6 ± 0.3	0	-9.6 ± 0.3
Y5V5	-9.6 ± 0.0	0	-9.6 ± 0.0
H5I5	-9.4 ± 2.5	N/A	N/A
Y5C5	-9.3 ± 0.1	0	-9.3 ± 0.1
Y5A4	-9.2 ± 2.6	N/A	N/A
H5M5	-9.1 ± 1.4	N/A	N/A
Y5A5	-8.9 ± 2.7	N/A	N/A
Y5M4	-8.8 ± 2.6	N/A	N/A
W5F4	-8.6 ± 3.1	N/A	N/A
Q5F4	-8.6 ± 3.1	N/A	N/A
N5F4	-8.6 ± 3.1	N/A	N/A
Y5I5	-8.5 ± 0.2	0	-8.5 ± 0.3
N5V5	-8.5 ± 3.0	N/A	N/A
W5V5	-8.5 ± 3.0	N/A	N/A
Q5V5	-8.5 ± 3.0	N/A	N/A
Y5M5	-8.3 ± 2.7	N/A	N/A
T5F4	-8.0 ± 2.9	N/A	N/A
T5V5	-8.0 ± 2.8	N/A	N/A
W5C4	-7.9 ± 3.2	N/A	N/A
Q5C4	-7.9 ± 3.2	N/A	N/A
N5C4	-7.9 ± 3.2	N/A	N/A
Q5F5	-7.9 ± 3.1	N/A	N/A
W5F5	-7.9 ± 3.1	N/A	N/A
N5F5	-7.9 ± 3.1	N/A	N/A
W5L5	-7.9 ± 3.0	N/A	N/A
N5L5	-7.9 ± 3.0	N/A	N/A
Q5L5	-7.9 ± 3.0	N/A	N/A
N5V4	-7.8 ± 3.1	N/A	N/A
Q5V4	-7.8 ± 3.1	N/A	N/A
W5V4	-7.8 ± 3.1	N/A	N/A
E5V5	-7.7 ± 2.8	N/A	N/A
W5I4	-7.6 ± 3.1	N/A	N/A
Q5I4	-7.6 ± 3.1	N/A	N/A
N5I4	-7.6 ± 3.1	N/A	N/A
S5F4	-7.5 ± 2.7	N/A	N/A
N5C5	-7.5 ± 3.1	N/A	N/A
Q5C5	-7.5 ± 3.1	N/A	N/A
W5C5	-7.5 ± 3.1	N/A	N/A
G5F4	-7.5 ± 2.9	N/A	N/A
D5V5	-7.4 ± 2.8	N/A	N/A
W5L4	-7.4 ± 3.1	N/A	N/A
Q5L4	-7.4 ± 3.1	N/A	N/A
N5L4	-7.4 ± 3.1	N/A	N/A
D5F4	-7.4 ± 2.9	N/A	N/A
T5F5	-7.4 ± 2.9	N/A	N/A
T5L5	-7.4 ± 2.8	N/A	N/A
T5C4	-7.4 ± 2.9	N/A	N/A
W5A4	-7.3 ± 3.2	N/A	N/A
Q5A4	-7.3 ± 3.2	N/A	N/A
N5A4	-7.3 ± 3.2	N/A	N/A
S5V5	-7.3 ± 0.2	0	-7.3 ± 0.2
T5V4	-7.2 ± 2.9	N/A	N/A
N5A5	-7.1 ± 3.1	N/A	N/A
W5A5	-7.1 ± 3.1	N/A	N/A
Q5A5	-7.1 ± 3.1	N/A	N/A
E5L5	-7.1 ± 2.8	N/A	N/A
E5C4	-7.1 ± 2.9	N/A	N/A
T5I4	-7.0 ± 2.9	N/A	N/A
T5C5	-7.0 ± 2.9	N/A	N/A
E5V4	-6.9 ± 2.8	N/A	N/A
S5F5	-6.9 ± 2.7	N/A	N/A
S5L5	-6.9 ± 2.7	N/A	N/A
T5L4	-6.9 ± 2.9	N/A	N/A
G5F5	-6.9 ± 2.8	N/A	N/A
N5M4	-6.9 ± 3.2	N/A	N/A
Q5M4	-6.9 ± 3.2	N/A	N/A
W5M4	-6.9 ± 3.2	N/A	N/A
G5L5	-6.8 ± 2.8	N/A	N/A
S5C4	-6.8 ± 2.7	N/A	N/A
K5V5	-6.8 ± 2.7	N/A	N/A
D5F5	-6.8 ± 2.8	N/A	N/A
G5C4	-6.8 ± 2.9	N/A	N/A
E5F4	-6.8 ± 1.2	N/A	N/A
E5I4	-6.7 ± 2.9	N/A	N/A
K5F4	-6.7 ± 2.8	N/A	N/A
E5C5	-6.7 ± 2.9	N/A	N/A
D5C4	-6.7 ± 2.9	N/A	N/A
R5V5	-6.7 ± 2.7	N/A	N/A
R5F4	-6.6 ± 2.7	N/A	N/A
E5L4	-6.6 ± 2.8	N/A	N/A
D5V4	-6.6 ± 2.8	N/A	N/A
Q5M5	-6.6 ± 3.1	N/A	N/A
N5M5	-6.6 ± 3.1	N/A	N/A
W5M5	-6.6 ± 3.1	N/A	N/A
S5C5	-6.5 ± 2.7	N/A	N/A
G5C5	-6.5 ± 2.9	N/A	N/A
E5A4	-6.5 ± 2.9	N/A	N/A
G5I4	-6.5 ± 2.8	N/A	N/A
R5L5	-6.5 ± 0.2	0	-6.5 ± 0.2
D5C5	-6.4 ± 2.9	N/A	N/A
D5I4	-6.4 ± 2.8	N/A	N/A
S5I4	-6.4 ± 0.1	0	-6.4 ± 0.1
E5A5	-6.4 ± 2.9	N/A	N/A
S5L4	-6.3 ± 2.7	N/A	N/A
T5M4	-6.3 ± 2.9	N/A	N/A
G5L4	-6.3 ± 2.8	N/A	N/A
S5A4	-6.2 ± 2.7	N/A	N/A
K5F5	-6.2 ± 2.7	N/A	N/A
G5A4	-6.2 ± 2.9	N/A	N/A
K5L5	-6.2 ± 2.7	N/A	N/A
S5A5	-6.2 ± 2.8	N/A	N/A
T5A4	-6.2 ± 1.4	N/A	N/A
G5A5	-6.1 ± 2.9	N/A	N/A
D5A4	-6.1 ± 2.9	N/A	N/A
R5F5	-6.1 ± 2.7	N/A	N/A
W5I5	-6.1 ± 3.0	N/A	N/A
N5I5	-6.1 ± 3.0	N/A	N/A
Q5I5	-6.1 ± 3.0	N/A	N/A
T5M5	-6.1 ± 2.9	N/A	N/A
D5A5	-6.1 ± 2.9	N/A	N/A
K5C4	-6.1 ± 2.8	N/A	N/A
E5M4	-6.0 ± 2.9	N/A	N/A
E5F5	-6.0 ± 0.0	0	-6.0 ± 0.0
G5V5	-6.0 ± 0.2	9	-6.0 ± 0.2
T5A5	-5.9 ± 0.0	0	-5.9 ± 0.0
R5C4	-5.9 ± 2.7	N/A	N/A
K5V4	-5.9 ± 2.7	N/A	N/A
K5C5	-5.8 ± 2.8	N/A	N/A
E5M5	-5.8 ± 2.9	N/A	N/A
S5M4	-5.8 ± 2.7	N/A	N/A
R5V4	-5.8 ± 2.7	N/A	N/A
G5M4	-5.7 ± 2.9	N/A	N/A
R5C5	-5.7 ± 2.8	N/A	N/A
D5M4	-5.7 ± 2.9	N/A	N/A
S5M5	-5.6 ± 2.8	N/A	N/A
T5I5	-5.6 ± 2.8	N/A	N/A
S5V4	-5.6 ± 0.0	0	-5.6 ± 0.0
K5L4	-5.6 ± 2.7	N/A	N/A
G5M5	-5.6 ± 2.9	N/A	N/A
D5M5	-5.5 ± 2.9	N/A	N/A
K5A4	-5.5 ± 2.8	N/A	N/A
K5A5	-5.5 ± 2.8	N/A	N/A
R5A5	-5.4 ± 2.8	N/A	N/A
G5V4	-5.3 ± 1.2	N/A	N/A
R5A4	-5.3 ± 2.8	N/A	N/A
E5I5	-5.3 ± 2.8	N/A	N/A
R5I4	-5.2 ± 1.2	N/A	N/A
D5L5	-5.2 ± 0.1	0	-5.2 ± 0.1
G5I5	-5.1 ± 2.8	N/A	N/A
D5I5	-5.0 ± 2.8	N/A	N/A
R5M4	-4.9 ± 2.8	N/A	N/A
K5I4	-4.9 ± 1.2	N/A	N/A
D5L4	-4.8 ± 1.2	N/A	N/A
R5M5	-4.8 ± 2.8	N/A	N/A
S5I5	-4.0 ± 0.3	0	-4.0 ± 0.3
R5I5	-3.9 ± 0.1	0	-3.9 ± 0.1
K5M4	-3.8 ± 1.4	N/A	N/A
R5L4	-3.5 ± 0.2	0	-3.4 ± 0.2
K5M5	-3.5 ± 0.1	0	-3.5 ± 0.1
K5I5	-3.4 ± 0.2	0	-3.4 ± 0.2
